# Supplementary material for: Impact of Phenol-Enriched Olive Oils on Serum Metabonome and Its Relationship with Cardiometabolic Parameters: A Randomized, Double-Blind, Cross-Over, Controlled Trial
Source: MDPI journal article supplement (doi:10.3390/antiox11101964), 2022-09-30
Supplement: s1 [file s1]

**Supplementary Table 1. Chemical characterization of the virgin olive oils used in the VOHF study.** Phenolic compounds, fat soluble micronutrients and fatty acids daily intake through 25 mL of VOO, FOO and FOOT.

|                                                  | WASH-OUT OO  | VOO          | FOO          | FOOT         |
|--------------------------------------------------|--------------|--------------|--------------|--------------|
| <b>PHENOLIC COMPOUNDS (mg/25 mL/day)</b>         |              |              |              |              |
| Hydroxytyrosol                                   | 0.04 ± 0.00  | 0.01 ± 0.00  | 0.21 ± 0.02  | 0.12 ± 0.00  |
| 3,4-DHPEA-AC                                     | n.d.         | n.d.         | 0.84 ± 0.06  | 0.39 ± 0.04  |
| 3,4-DHPEA-EDA*                                   | 0.04 ± 0.00  | 0.04 ± 0.00  | 6.73 ± 0.37  | 3.43 ± 0.29  |
| 3,4-DHPEA-EA*                                    | 0.11 ± 0.00  | 0.26 ± 0.04  | 0.71 ± 0.06  | 0.36 ± 0.03  |
| <b>Total hydroxytyrosol derivatives</b>          | <b>0.18</b>  | <b>0.3</b>   | <b>8.49</b>  | <b>4.3</b>   |
| p-hydroxybenzoic acid                            | n.d.         | n.d.         | 0.02 ± 0.00  | 0.06 ± 0.00  |
| Vanillic acid                                    | n.d.         | n.d.         | 0.07 ± 0.00  | 0.13 ± 0.01  |
| Caffeic acid                                     | n.d.         | n.d.         | 0.00 ± 0.00  | 0.06 ± 0.00  |
| Rosmarinic acid                                  | n.d.         | n.d.         | n.d.         | 0.41 ± 0.03  |
| <b>Total phenolic acids</b>                      | <b>-</b>     | <b>-</b>     | <b>0.09</b>  | <b>0.65</b>  |
| Thymol                                           | n.d.         | n.d.         | n.d.         | 0.64 ± 0.05  |
| Carvacrol                                        | n.d.         | n.d.         | n.d.         | 0.23 ± 0.02  |
| <b>Total monoterpenes</b>                        | <b>-</b>     | <b>-</b>     | <b>-</b>     | <b>0.86</b>  |
| Luteolin                                         | n.d.         | 0.04 ± 0.00  | 0.18 ± 0.02  | 0.21 ± 0.02  |
| Apigenin                                         | n.d.         | 0.02 ± 0.00  | 0.06 ± 0.00  | 0.1 ± 0.00   |
| Naringenin                                       | n.d.         | n.d.         | n.d.         | 0.2 ± 0.02   |
| Eriodictyol                                      | n.d.         | n.d.         | n.d.         | 0.17 ± 0.01  |
| Thymusin                                         | n.d.         | n.d.         | n.d.         | 1.22 ± 0.09  |
| Xanthomicrol                                     | n.d.         | n.d.         | n.d.         | 0.53 ± 0.06  |
| 7-methylsudachitin                               | n.d.         | n.d.         | n.d.         | 0.53 ± 0.09  |
| <b>Total flavonoids</b>                          | <b>n.d.</b>  | <b>0.06</b>  | <b>0.23</b>  | <b>2.95</b>  |
| Pinoresinol                                      | n.d.         | 0.05 ± 0.00  | 0.12 ± 0.00  | 0.1 ± 0.05   |
| Acetoxipinoresinol**                             | n.d.         | 2.47 ± 0.19  | 3.66 ± 0.31  | 3.24 ± 0.28  |
| <b>Total lignans</b>                             | <b>n.d.</b>  | <b>2.52</b>  | <b>3.78</b>  | <b>3.34</b>  |
| <b>FAT SOLUBLE MICRONUTRIENTS (mg/25 mL/day)</b> |              |              |              |              |
| α-tocopherol                                     | 1.82 ± 0.02  | 3.27 ± 0.01  | 3.4 ± 0.02   | 3.44 ± 0.01  |
| lutein                                           | 0.02 ± 0.00  | 0.05 ± 0.00  | 0.06 ± 0.00  | 0.07 ± 0.00  |
| β-cryptoxanthin                                  | 0.01 ± 0.00  | 0.02 ± 0.00  | 0.03 ± 0.00  | 0.02 ± 0.00  |
| β-carotene                                       | n.d.         | 0.01 ± 0.00  | 0.02 ± 0.00  | 0.02 ± 0.00  |
| <b>FATTY ACIDS (relative area %)</b>             |              |              |              |              |
| Palmitic acid (C16:0)                            | 11.96        | 11.21        | 11.2         | 11.21        |
| Stearic acid (C18:0)                             | 3.08         | 1.92         | 1.92         | 1.92         |
| Araquidic acid (C20:0)                           | 0.41         | 0.36         | 0.36         | 0.36         |
| Behenic acid (C22:0)                             | 0.11         | 0.11         | 0.11         | 0.11         |
| <b>Total saturated</b>                           | <b>15.67</b> | <b>13.75</b> | <b>13.74</b> | <b>13.75</b> |
| Palmitoleic acid (C9-C16:1)                      | 1.00         | 0.7          | 0.7          | 0.69         |
| Oleic acid (C9-C18:1)                            | 72.71        | 76.74        | 76.83        | 76.75        |
| Gadoleic acid (C11-C20:1)                        | 0.25         | 0.27         | 0.27         | 0.27         |
| <b>Total monounsaturated</b>                     | <b>73.96</b> | <b>77.71</b> | <b>77.8</b>  | <b>77.72</b> |
| Linoleic acid                                    | 9.39         | 7.43         | 7.36         | 7.43         |
| Timnodonic acid                                  | 0.20         | 0.36         | 0.36         | 0.35         |
| Linolenic acid                                   | 0.54         | 0.43         | 0.43         | 0.43         |
| <b>Total polyunsaturated</b>                     | <b>10.13</b> | <b>8.22</b>  | <b>8.15</b>  | <b>8.22</b>  |

Values are expressed as mean ± standard deviation (SD). The acidic composition is expressed as relative area percentage. VOO, virgin olive oil; FVOO, functional VOO enriched with its own phenolic compounds; FVOOT, functional VOO enriched with its own phenolic compounds plus additional complementary ones from thyme; 3,4-DHPEA-AC, 4-(acetoxymethyl)-1,2-dihydroxybenzene; 3,4-

DHPEA-EDA, dialdehyde form of elenolic acid linked to hydroxytyrosol; 3,4-DHPEA-EA, oleuropeinaglycone; n.d., not detected.  
\*Quantified with a calibration curve of hydroxytyrosol. \*\*Quantified with a calibration curve of pinoresinol.
